# Supplementary material
Source: HighWire-hosted journal article supplement (https://erj.ersjournals.com/content/55/5/1901466)
Supplement: inline-supplementary-material-1 [file inline-supplementary-material-1.pdf]

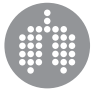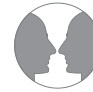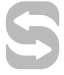

SHAREABLE PDF

# Inspiratory vocal cord closure in COPD

Paul Leong<sup>1,2,6</sup>, Laurence E. Ruane<sup>1,2,6</sup>, Debra Phyland<sup>3</sup>, Joo Koh<sup>3</sup>, Martin I. MacDonald<sup>1,2</sup>, Malcom Baxter<sup>3</sup>, Kenneth K. Lau<sup>4</sup>, Kais Hamza<sup>5</sup> and Philip G. Bardin<sup>1,2</sup>

**Affiliations:** <sup>1</sup>Monash Lung and Sleep, Monash Health and Monash University, Clayton, Australia. <sup>2</sup>Hudson Institute, Clayton, Australia. <sup>3</sup>Dept of Otolaryngology, Head and Neck Surgery, Monash Health, Clayton, Australia. <sup>4</sup>Diagnostic Imaging, Monash University and Monash Health, Clayton, Australia. <sup>5</sup>Dept of Mathematical Sciences, Monash University, Clayton, Australia. <sup>6</sup>Equal contribution.

**Correspondence:** Paul Leong, Monash Lung and Sleep, 246 Clayton Rd, Clayton, Victoria, 3168, Australia. E-mail: paul.leong@monash.edu

 @ERSpublications

**Inspiratory vocal cord closure is surprisingly prevalent in COPD** <http://bit.ly/2TVHMn0>

**Cite this article as:** Leong P, Ruane LE, Phyland D, *et al.* Inspiratory vocal cord closure in COPD. *Eur Respir J* 2020; 55: 1901466 [<https://doi.org/10.1183/13993003.01466-2019>].

This single-page version can be shared freely online.

*To the Editor:*

During normal inspiration, vocal cord movements are limited, although mild abduction (widening) can occur [1]. Inspiratory closure is characteristic of vocal cord dysfunction (VCD), a condition that can cause refractory breathlessness [1, 2]. VCD may occur in otherwise healthy individuals and 20–40% of stable asthma patients [3], however, abnormal inspiratory vocal cord activities and putative VCD have not been investigated in other obstructive lung diseases. It is therefore of interest to determine whether inspiratory closure occurs in COPD.
